# Supplementary material
Source: publisher site journal article supplement (https://www.dovepress.com/article/334738)
Supplement: Supplementary file 1 [file get_supplementary_file.php]

**Supplementary Figures**

**Figure S1**

**Kaplan-Meier curves for 15-year death-censored graft survival after kidney transplantation according to the presence of TNFvariant in the donor and recipient.**

**
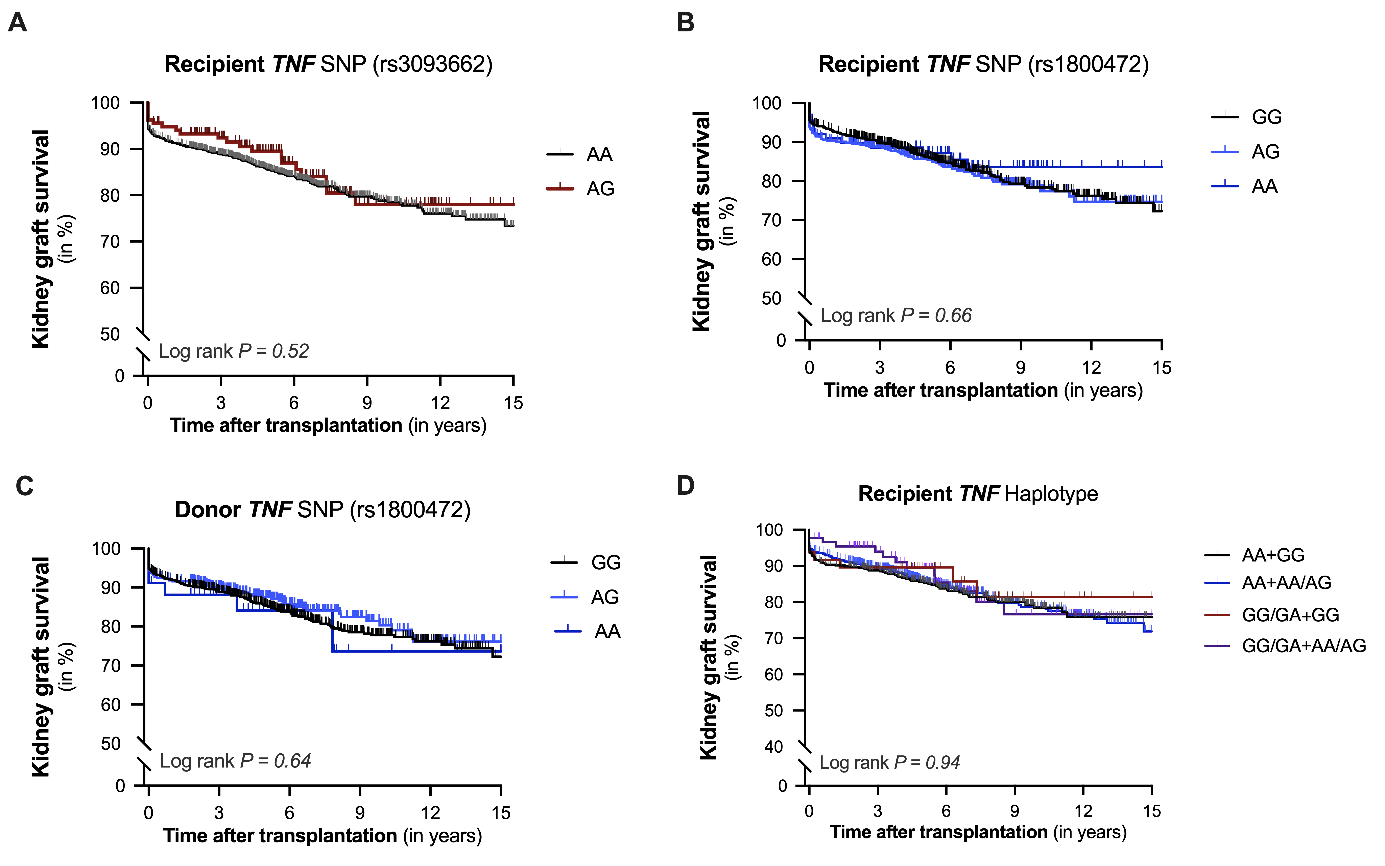
**

Cumulative 15-year death-censored kidney graft survival according to the presence of (**A**) the rs3093662 A>G polymorphism in the tumor necrosis factor-alpha gene (*TNF*) in the recipient, and the presence of the rs1800472 G>A polymorphism in *TNF* in the (**B**) donor and (**C**) recipient. (**D**) Pairs were also divided into four groups according to the absence of both *TNF* polymorphisms (black line), the presence of only the A-allele of the rs1800629 polymorphism (blue line), the presence of only the G-allele of the rs3093662 polymorphism (red line), or the presence of both minor alleles (purple line).The Log-rank test was used to compare the graft loss incidence between the different groups.
